# Supplementary material
Source: PubMed Central journal article supplement (PMC4474233)
Supplement: NIHMS699028-supplement-supplement_1.pdf [file NIHMS699028-supplement-supplement_1.pdf]

## ***Supporting Information for***

### **Molecular Docking Screening using Agonist-Bound GPCR Structures: Probing the A<sub>2A</sub> Adenosine Receptor**

David Rodríguez,<sup>1,2,3</sup> Zhang-Guo Gao,<sup>4</sup> Steven M. Moss,<sup>4</sup> Kenneth A. Jacobson,<sup>4\*</sup> and Jens Carlsson<sup>1,2,3\*</sup>

<sup>1</sup>Science for Life Laboratory, Stockholm University, Box 1031, SE-171 21 Solna, Sweden. <sup>2</sup>Swedish e-Science Research Center (SeRC), Sweden. <sup>3</sup>Department of Biochemistry and Biophysics and Center for Biomembrane Research, Stockholm University, SE-106 91 Stockholm, Sweden. <sup>4</sup>Molecular Recognition Section, Laboratory of Bioorganic Chemistry, National Institute of Diabetes and Digestive and Kidney Diseases, National Institutes of Health, Bethesda, MD 20892, USA

\*E-mail: jens.carlsson@dbb.su.se, kennethj@helix.nih.gov

#### **Supporting Information Inventory:**

**Table S1.** Modified partial charges for residues Asn253<sup>6,55</sup>, Ser277<sup>7,42</sup>, and His278<sup>7,43</sup>.

**Table S2.** 2D structure and pharmacological properties of meperidine, which was selected as reference opioid receptor agonist.

**Table S3.** Quantification of the number of top-ranked known agonists and antagonist in docking screens using the ZINC database as background.

**Table S4.** Radioligand binding data for predicted ligands at the three human AR subtypes.

**Table S5.** Functional assays for discovered ligands.

**Table S6.** 2D similarities of the discovered ligands to the closest ChEMBL compounds.

**Table S7.** List of compounds from top-ranked complexes that are predicted to have ligand-receptor interactions similar to agonist-bound crystal structures of the A<sub>2A</sub>AR.

#### **Supplemental references**

**Table S1. Modified partial charges for residues Asn253<sup>6.55</sup>, Ser277<sup>7.42</sup>, and His278<sup>7.43</sup>.** For each residue, partial charges for all atoms are shown for the default AMBER parameters, the modified values used to increase the side chain dipole moment, and the difference between the two. The average docking energies for reference A<sub>2A</sub>AR agonists improved by 7 kcal/mol for modified grids. For example, the value for adenosine decreased from -25.7 to -31.5 kcal/mol after the modification to the electrostatic potential grids.

| Atom name                    | Default partial charge | Modified partial charge | $\Delta$ (partial charge) |
|------------------------------|------------------------|-------------------------|---------------------------|
| <b>Asn253<sup>6.55</sup></b> |                        |                         |                           |
| N                            | -0.520                 | -0.520                  |                           |
| CA                           | 0.217                  | 0.217                   |                           |
| C                            | 0.526                  | 0.526                   |                           |
| O                            | -0.500                 | -0.500                  |                           |
| CB                           | 0.003                  | 0.003                   |                           |
| CG                           | 0.675                  | 0.675                   |                           |
| ND2                          | -0.867                 | -0.867                  |                           |
| OD1                          | -0.470                 | -0.870                  | -0.4                      |
| HN                           | 0.248                  | 0.248                   |                           |
| HND2                         | 0.344                  | 0.544                   | +0.2                      |
| HND1                         | 0.344                  | 0.544                   | +0.2                      |
| <b>Ser277<sup>7.42</sup></b> |                        |                         |                           |
| N                            | -0.520                 | -0.520                  |                           |
| CA                           | 0.292                  | 0.292                   |                           |
| C                            | 0.526                  | 0.526                   |                           |
| O                            | -0.500                 | -0.500                  |                           |
| CB                           | 0.194                  | 0.194                   |                           |
| OG                           | -0.550                 | -1.350                  | -0.8                      |
| HN                           | 0.248                  | 0.248                   |                           |
| HOG                          | 0.310                  | 1.110                   | +0.8                      |
| <b>His278<sup>7.43</sup></b> |                        |                         |                           |
| N                            | -0.520                 | -0.520                  |                           |
| CA                           | 0.219                  | 0.219                   |                           |
| C                            | 0.526                  | 0.526                   |                           |
| O                            | -0.500                 | -0.500                  |                           |
| CB                           | 0.060                  | 0.060                   |                           |
| CG                           | 0.089                  | 0.089                   |                           |
| CD2                          | 0.145                  | 0.545                   | +0.4                      |
| ND1                          | -0.444                 | -0.444                  |                           |
| CE1                          | 0.384                  | 0.784                   | +0.4                      |
| NE2                          | -0.527                 | -1.327                  | -0.8                      |
| HN                           | 0.248                  | 0.248                   |                           |
| HND                          | 0.320                  | 0.320                   |                           |

**Table S2. 2D structure and pharmacological properties of meperidine, which was selected as reference opioid receptor agonist.**

| Name(s)                                        | Structure                                                                         | Pharmacological profile                                                                                                                                                                                                                                               |
|------------------------------------------------|-----------------------------------------------------------------------------------|-----------------------------------------------------------------------------------------------------------------------------------------------------------------------------------------------------------------------------------------------------------------------|
| <p>Meperidine<br/>(Phetidine,<br/>Demerol)</p> | 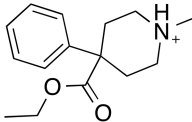 | <p><u>IC<sub>50</sub> values:</u><sup>1</sup><br/> <math>\mu</math>-OR = 315 nM<br/> <math>\kappa</math>-OR = 2,370 nM<br/> <math>\delta</math>-OR = &gt;10,000 nM</p> <p>Synthetic opiate agonist<br/> from the phenylpiperidine<br/> class of drugs<sup>2</sup></p> |

**Table S3. Quantification of the number of top-ranked known agonists and antagonist in docking screens using the ZINC database as background.** Based on the predicted scores for known agonists (63) and antagonists (357), we quantified how many of these ligands would have been ranked in the top 0.3% of the screened library of commercially available compounds.

|                                               | <b>2YDO</b> | <b>2YDV</b> | <b>3QAK</b>  | <b>3EML</b> |
|-----------------------------------------------|-------------|-------------|--------------|-------------|
| # agonists                                    | 24          | 8           | 9            | 0           |
| % agonist set                                 | 38.1%       | 12.7%       | 14.3%        | 0.0%        |
| # antagonists                                 | 49          | 45          | 5            | 37          |
| % antagonist set                              | 13.1%       | 12.0%       | 1.3%         | 9.9%        |
| ratio (# agonists) /<br>(# antagonists)       | <i>0.5x</i> | <i>0.2x</i> | <i>1.8x</i>  | <i>0.0x</i> |
| ratio (% agonist set) /<br>(% antagonist set) | <i>2.9x</i> | <i>1.1x</i> | <i>10.7x</i> | <i>0.0x</i> |

**Table S4. Radioligand binding data for predicted ligands at the A<sub>1</sub>, A<sub>2A</sub>, and A<sub>3</sub> human AR subtypes.**

| Cpd | ZINC code | SMILES                                                          | PDB code active <sup>a</sup> | K <sub>i</sub> (nM) or %inh @ 10 μM <sup>b</sup> |                    |                   |
|-----|-----------|-----------------------------------------------------------------|------------------------------|--------------------------------------------------|--------------------|-------------------|
|     |           |                                                                 |                              | A <sub>1</sub> AR                                | A <sub>2A</sub> AR | A <sub>3</sub> AR |
| 13  | C71708091 | <chem>c1ccc2c(c1)c(c[nH]2)c3cc(c(c(n3)N)C#N)c4ccc(o4)CO</chem>  | 2YDO                         | 1,520 ± 60                                       | 1,290 ± 280        | 128 ± 17          |
| 14  | C67559048 | <chem>COc1ccccc1OCc2cc(n[nH]2)C(=O)N3CC[C@H](C3)O</chem>        | 2YDO                         | 10 ± 5%                                          | 18 ± 7%            | 17 ± 5%           |
| 15  | C71738699 | <chem>c1cc(oc1CO)c2c3c(nc(c2C#N)N)-c4cc[nH]c4CC3</chem>         | 2YDO                         | 217 ± 63                                         | 37.2 ± 7.8         | 378 ± 129         |
| 16  | C67714485 | <chem>Cc1ccc(o1)c2cc(c(c(n2)N)C#N)c3ccc(o3)CO</chem>            | 2YDO                         | 122 ± 27                                         | 175 ± 30           | 22.1 ± 8          |
| 17  | C71764951 | <chem>c1cc(cc(c1)O)c2c3c(nc(c2C#N)N)-c4cc[nH]c4CC3</chem>       | 2YDO                         | 37.7 ± 3.8                                       | 15.9 ± 4.7         | 513 ± 110         |
| 18  | C71575632 | <chem>c1cc(oc1CO)c2c3c(nc(c2C#N)N)CCOC3</chem>                  | 2YDO                         | 783 ± 216                                        | 390 ± 50           | 3,790 ± 1330      |
| 19  | C71771533 | <chem>CCn1c(c(c(n1)C)c2cc(c(c(n2)N)C#N)c3ccc(cc3)O)C</chem>     | 2YDO                         | 54 ± 2%                                          | 1,670 ± 154        | 2,900 ± 112       |
| 20  | C71750186 | <chem>c1ccc2c(c1)c(c[nH]2)c3cc(c(c(n3)N)C#N)c4c[nH]cn4</chem>   | 2YDV                         | 1,310 ± 20                                       | 760 ± 50           | 412 ± 61          |
| 21  | C67894633 | <chem>c1cn(c([nH+])1)c2nc(nc2)NC[C@H]3CCCCO3)CCO</chem>         | 3QAK                         | 11 ± 3%                                          | 4 ± 3%             | 18 ± 5%           |
| 22  | C69872248 | <chem>c1c[nH]c2c1c(ncn2)N3CCCC[C@H]3Cn4cn4</chem>               | 2YDO                         | 7 ± 3%                                           | 15 ± 4%            | 13 ± 2%           |
| 23  | C08345951 | <chem>c1ccc(cc1)c2c3cc(cnn3c(n2)N)C(=O)c4ccccc4O</chem>         | 2YDO                         | 63.1 ± 31.9                                      | 262 ± 73           | 365 ± 58          |
| 24  | C72275965 | <chem>COc1ccc(cc1)CCNc2cc(ncn2)N3CCCC[C@H]3CO</chem>            | 3QAK                         | 16 ± 2%                                          | 11 ± 4%            | 40 ± 5%           |
| 25  | C75128452 | <chem>c1cc(occ1)CNc2cc(ncn2)N3CCCC[C@H]3CO)F</chem>             | 3QAK                         | 6 ± 4%                                           | 24 ± 9%            | 23 ± 4%           |
| 26  | C08735001 | <chem>C[C@H](C(=O)N)Sc1nnc(s1)NCc2ccccc2</chem>                 | 3QAK                         | 5 ± 2%                                           | 9 ± 5%             | 15 ± 4%           |
| 27  | C02616094 | <chem>CN1Cc2cc(cnc2NC1=O)C(=O)c3cc(ccc3O)OC</chem>              | 3QAK                         | 18 ± 2%                                          | 25 ± 8%            | 42 ± 3%           |
| 28  | C72806511 | <chem>c1cc(ccc1OCc2nc([nH]n2)SCCCO)Cl</chem>                    | 2YDV                         | 6 ± 2%                                           | 8 ± 8%             | 15 ± 1%           |
| 29  | C84852928 | <chem>Cc1cccc(c1)Nc2nnc(s2)SCC3(COC3)CO</chem>                  | 3QAK                         | 11 ± 4%                                          | 22 ± 7%            | 26 ± 4%           |
| 30  | C00197243 | <chem>Cc1e2c(n(n1)c3ccccc3)OC(=C([C@H]2c4ccc(cc4)O)C#N)N</chem> | 2YDO                         | 11 ± 1%                                          | 28 ± 10%           | 12 ± 7%           |
| 31  | C05026096 | <chem>Cc1ccc(cc1C)Nc2nc(c(c(n2)NCCO)[N+](=O)[O-])N</chem>       | 2YDO                         | 38 ± 1%                                          | 3,110 ± 260        | 363 ± 81          |
| 32  | C20102586 | <chem>Oc1ccc(Cl)cc1C(=O)c1cnc2NNC(=O)c2c1</chem>                | 2YDO                         | 12 ± 1%                                          | 0 ± 0%             | 24 ± 4%           |

<sup>a</sup> The PDB code of the crystal structure used in the docking screen.

<sup>b</sup> Data is expressed as mean ± standard error resulting from three independent experiments.

**Table S5. Functional assays for discovered ligands.** Data shows the effect of 10  $\mu\text{M}$  compound concentration on intracellular cAMP levels. An additional control experiment for compound **23**, which demonstrates that the observed increase in cAMP is not mediated by the  $A_{2A}\text{AR}$ , is also shown.

| Compound  | Relative cAMP levels @ 10 $\mu\text{M}$ <sup>a,b</sup> | EC <sub>50</sub> ( $\mu\text{M}$ ) <sup>b</sup> |                         |
|-----------|--------------------------------------------------------|-------------------------------------------------|-------------------------|
|           |                                                        | CHO                                             | CHO + $A_{2A}\text{AR}$ |
| forskolin | 100%                                                   | 3.8 $\pm$ 0.4                                   | 0.9 $\pm$ 0.1           |
| CGS21680  | 79.8 $\pm$ 13.5%                                       | N.E. <sup>c</sup>                               | 0.009 $\pm$ 0.001       |
| <b>23</b> | 32.4 $\pm$ 5.4 %                                       | 25.5 $\pm$ 4.0                                  | 16.4 $\pm$ 2.7          |
| <b>13</b> | 4.0 $\pm$ 7.8 %                                        | -                                               | -                       |
| <b>15</b> | -22.6 $\pm$ 10.7 %                                     | -                                               | -                       |
| <b>16</b> | -0.3 $\pm$ 2.9 %                                       | -                                               | -                       |
| <b>17</b> | -4.7 $\pm$ 2.1 %                                       | -                                               | -                       |
| <b>18</b> | 4.6 $\pm$ 9.3 %                                        | -                                               | -                       |
| <b>19</b> | 6.5 $\pm$ 2.8 %                                        | -                                               | -                       |
| <b>20</b> | 7.9 $\pm$ 3.5 %                                        | -                                               | -                       |
| <b>31</b> | 12.5 $\pm$ 0.7 %                                       | -                                               | -                       |

<sup>a</sup> Increase in cAMP levels at a compound concentration of 10  $\mu\text{M}$ .

<sup>b</sup> Data is expressed as mean  $\pm$  standard error resulting from three independent experiments.

<sup>c</sup> No effect.

**Table S6. 2D similarities of the discovered ligands to the closest ChEMBL compounds.** Each discovered ligand is shown together with the closest annotated AR compound from the ChEMBL15 database. The Tanimoto similarity coefficient ( $T_c$ ), calculated with ECFP4 fingerprints, is also indicated for each compound pair.

| Compound ID | Structure | $T_c^a$ | Closest ChEMBL <sup>b</sup> |
|-------------|-----------|---------|-----------------------------|
| 13          |           | 0.45    |                             |
| 15          |           | 0.38    |                             |
| 16          |           | 0.68    |                             |
| 17          |           | 0.51    |                             |
| 18          |           | 0.40    |                             |
| 19          |           | 0.58    |                             |
| 20          |           | 0.45    |                             |
| 23          |           | 0.32    |                             |
| 31          |           | 0.30    |                             |

<sup>a</sup> Tanimoto coefficient of molecular similarity calculated with ECFP4 fingerprints.

<sup>b</sup> Closest molecule annotated as AR ligand in ChEMBL15 database.

**Table S7. List of compounds from top-ranked complexes that are predicted to have ligand-receptor interactions similar to agonist-bound crystal structures of the A<sub>2A</sub>AR.** The top 50,000 ranked complexes in docking screens for each of the A<sub>2A</sub>AR agonist-bound structures (PDB codes 2YDO, 2YDV and 3QAK) were filtered according to the establishment of a double hydrogen bond with Asn253<sup>6,55</sup>, and polar contacts to both Ser277<sup>7,42</sup> and His278<sup>7,43</sup> with two different hydrogen bonding atoms. Heteroatom distance cutoff for a hydrogen bond was set to 3.5 Å.

| #           | Rank <sup>a</sup> | ZINC ID                |
|-------------|-------------------|------------------------|
| <b>2YDO</b> |                   |                        |
| 1           | 49                | C67896118              |
| 2           | 58                | C67642542              |
| 3           | 283               | C67967614              |
| 4           | 322               | C67982301              |
| 5           | 503               | C67786606              |
| 6           | 507               | C67802867              |
| 7           | 566               | C20906941              |
| 8           | 646               | C67713073              |
| 9           | 668               | C20905254              |
| 10          | 851               | C67726538              |
| 11          | 932               | C20428995              |
| 12          | 1,210             | C67694675              |
| 13          | 1,330             | C22978383              |
| 14          | 1,415             | C32692837              |
| 15          | 1,419             | C67674127              |
| 16          | 1,967             | C67783349              |
| 17          | 2,551             | C21038636              |
| 18          | 3,053             | C53357683              |
| 19          | 3,223             | C72582255              |
| 20          | 3,369             | C78991781              |
| 21          | 3,645             | C20494508              |
| 22          | 3,708             | C67855415              |
| 23          | 3,901             | C12377095              |
| 24          | 4,679             | C84405954              |
| 25          | 5,904             | C59018757              |
| 26          | 6,329             | C79916271              |
| 27          | 6,504             | C59018508              |
| 28          | 7,495             | C00134008              |
| 29          | 8,271             | C78485552              |
| 30          | 9,312             | C81783517              |
| 31          | 10,347            | C71748784              |
| <b>2YDO</b> |                   |                        |
| 32          | 11,745            | C77840936              |
| 33          | 11,903            | C79453266              |
| 34          | 12,086            | C81238528              |
| 35          | 14,142            | C06122390              |
| 36          | 16,465            | C20906238              |
| 37          | 18,048            | C15657781 <sup>b</sup> |
| 38          | 18,072            | C47707534              |
| 39          | 18,547            | C20479767              |
| 40          | 23,369            | C81763365              |
| 41          | 26,670            | C67840882              |
| 42          | 33,273            | C83323908 <sup>b</sup> |
| 43          | 37,185            | C67920483              |
| 44          | 37,747            | C82060213              |
| 45          | 37,789            | C17009153              |
| 46          | 40,786            | C06341871              |
| 47          | 42,845            | C76760826              |
| 48          | 44,639            | C22782433              |
| <b>2YDV</b> |                   |                        |
| 49          | 5,328             | C15657781 <sup>c</sup> |
| 50          | 3,090             | C79682059 <sup>d</sup> |
| 51          | 10,521            | C32091424 <sup>d</sup> |
| 52          | 17,531            | C83291127              |
| 53          | 17,922            | C83291128              |
| 54          | 16,730            | C83323908 <sup>c</sup> |
| 55          | 38,132            | C78485551              |
| 56          | 42,086            | C67847751              |
| <b>3QAK</b> |                   |                        |
| 57          | 26,120            | C32091424 <sup>c</sup> |
| 58          | 28,194            | C73970936              |
| 59          | 35,396            | C05523326              |
| 60          | 37,878            | C79682059 <sup>c</sup> |

<sup>a</sup> Docking rank in screens of 6.7 million commercially available compounds against three agonist-bound structures of the A<sub>2A</sub>AR.

<sup>b</sup> Also selected from the screen on PDB structure 2YDV.

<sup>c</sup> Also selected from the screen on PDB structure 2YDO.

<sup>d</sup> Also selected from the screen on PDB structure 3QAK.



## Supplemental references

(1) Poulain, R.; Horvath, D.; Bonnet, B.; Eckhoff, C.; Chapelain, B.; Bodinier, M. C.; Deprez, B. From Hit to Lead. Combining Two Complementary Methods for Focused Library Design. Application to Mu Opiate Ligands. *J. Med. Chem.* **2001**, *44* (21), 3378-90.

(2) Bryant, B. J.; Knights, K. M.; Salerno, E., *Pharmacology for Health Professionals*. Elsevier Australia: Chatswood, N.S.W., 2010.
